# Supplementary material for: Comparison of Long-Term Complications of COVID-19 Illness among a Diverse Sample of Children by MIS-C Status
Source: MDPI journal article supplement (doi:10.3390/ijerph192013382), 2022-10-17
Supplement: s1 [file s1]

**Supplemental Table S1.** Sensitivity analysis for missing data.

|                                             | MIS-C (N=26)     |                      |         | Non-MISC (N=286)  |                       |         |
|---------------------------------------------|------------------|----------------------|---------|-------------------|-----------------------|---------|
|                                             | Missing<br>(N=4) | No missing<br>(N=22) | P-value | Missing<br>(N=46) | No missing<br>(N=240) | P-value |
| Age at diagnosis,<br>years, mean (SD)       | 6.25 (2.5)       | 10.69<br>(5.23)      | 0.127   | 6.43 (6.04)       | 6.55 (5.96)           | 0.905   |
| Boys, n (%)                                 | 2 (50.0)         | 11 (50)              | 1.0     | 24 (52.17)        | 141 (58.75)           | 0.41    |
| Race/ethnicity, n (%)                       |                  |                      | 0.882   |                   |                       | 0.054   |
| Non-Hispanic<br>White                       | 1 (25.0)         | 6 (27.27)            |         | 15 (32.61)        | 42 (17.5)             |         |
| Non-Hispanic<br>Black                       | 1 (25.0)         | 6 (27.27)            |         | 6 (13.04)         | 47 (16.4)             |         |
| Hispanic                                    | 1 (25.0)         | 8 (36.36)            |         | 21 (45.65)        | 140 (58.33)           |         |
| Other/unknown                               | 1 (25.0)         | 2 (9.09)             |         | 4 (8.69)          | 11 (4.58)             |         |
| Education                                   |                  |                      | 0.399   |                   |                       | 0.177   |
| Preschool                                   | 2 (50.0)         | 3 (13.64)            |         | 31 (67.39)        | 127 (52.92)           |         |
| Elementary school                           | 2 (50.0)         | 11 (50.0)            |         | 4 (8.69)          | 53 (22.08)            |         |
| Middle school                               | 0 (0)            | 3 (13.64)            |         | 4 (8.69)          | 22 (9.17)             |         |
| High school and<br>above                    | 0 (0)            | 5 (22.73)            |         | 7 (15.22)         | 37 (15.42)            |         |
| Insurance status                            |                  |                      | 0.380   |                   |                       | 0.001   |
| No insurance                                | 0 (0)            | 1 (4.54)             |         | 2 (8.33)          | 5 (2.13)              |         |
| Government<br>insurance                     | 1 (25.0)         | 14 (63.64)           |         | 10 (41.67)        | 181 (75.42)           |         |
| Private insurance                           | 3 (75.0)         | 7 (31.82)            |         | 12 (50.0)         | 49 (20.42)            |         |
| Hospitalization, n (%)                      | 4 (100)          | 21 (95.5)            | 1.0     | 38 (82.60)        | 203 (84.58)           | 0.736   |
| Hospital length of<br>stay, days, mean (SD) | 6.67 (5.0)       | 8.11 (1.20)          | 0.524   | 4.14 (0.91)       | 5.76 (1.14)           | 0.528   |

<sup>a</sup> T-test for continuous variable and chi-square analysis or Fisher's exact for categorical variable

**Supplemental Table S2.** Comparison of academic and physical activity at school by MIS-C status.

|                                                                   | <b>Total</b> | <b>MIS-C</b> | <b>Non-MISC</b> | <b>P-value<sup>a</sup></b> |
|-------------------------------------------------------------------|--------------|--------------|-----------------|----------------------------|
| Returned to school or daycare <sup>b</sup>                        |              |              |                 | 0.999                      |
| Yes                                                               | 147 (93.04)  | 21 (95.45)   | 126 (92.65)     |                            |
| No                                                                | 11 (6.96)    | 1 (4.55)     | 10 (7.35)       |                            |
| School format <sup>b</sup>                                        |              |              |                 | 0.040                      |
| Completely online                                                 | 37 (23.13)   | 7 (33.33)    | 30 (21.58)      |                            |
| Completely in-person                                              | 96 (60.0)    | 14 (66.67)   | 82 (58.99)      |                            |
| Hybrid                                                            | 27 (16.88)   | 0 (0)        | 27 (19.42)      |                            |
| Academic performance changed since pandemic <sup>b</sup>          |              |              |                 | 0.267                      |
| Better                                                            | 18 (10.98)   | 0 (0)        | 18 (12.5)       |                            |
| Worse                                                             | 38 (23.17)   | 5 (25.0)     | 33 (22.92)      |                            |
| No change                                                         | 108 (65.85)  | 15 (75.0)    | 93 (64.58)      |                            |
| Physical activity performance changed since pandemic <sup>c</sup> |              |              |                 | 0.158                      |
| Yes                                                               | 24 (32.0)    | 6 (54.55)    | 18 (28.12)      |                            |
| No                                                                | 51 (68.0)    | 5 (45.45)    | 46 (71.88)      |                            |

<sup>a</sup> Chi-square analysis or Fisher's exact for categorical variable

<sup>b</sup> Asked only if a child enrolled in school or daycare

<sup>c</sup> Asked only if a child participated in any athletics or physical activity in or outside of school
